# Supplementary material
Source: Springer Nature journal article supplement (https://www.springermedizin.de/resource/supplementary/12959_2013_229_MOESM3_ESM.pdf/9569254)

**FIGURE 3:** Peri-procedural dosing schedule.

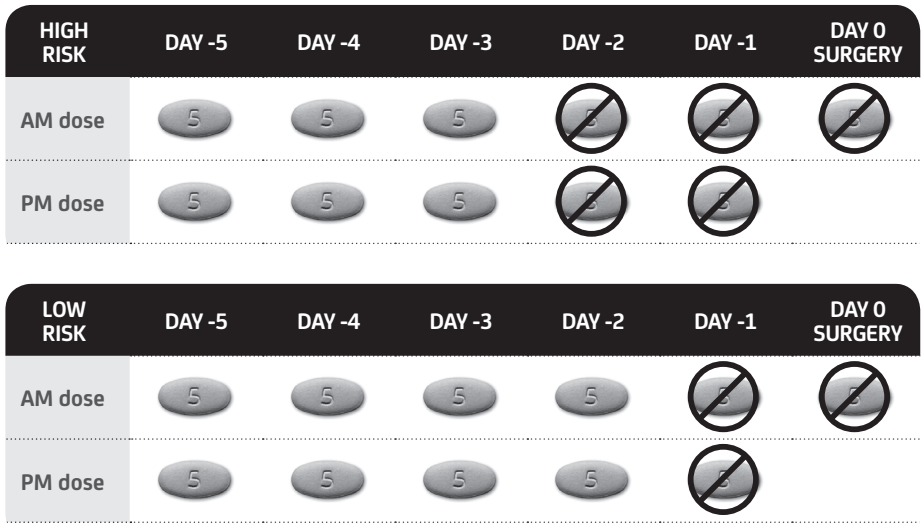

Skipped doses indicated by 

Supplement: MOESM3 [file 9569254]
